# Supplementary material for: Photophysical behaviour of 1-(4-N,N-dimethylaminophenylethynyl)pyrene (DMAPEPy) in homogeneous media
Source: Royal Society of Chemistry journal article supplement (doi:10.1039/b600009f), 2006-04-18
Supplement: b600009f.pdf [file b600009f.pdf]

**Photophysical Behaviour of  
1-(4-N,N-dimethylaminophenylethynyl)pyrene (DMAPEPy)  
in Homogeneous Media**

**Usharani Subuddhi, Sourav Haldar, S. Sankararaman and Ashok K. Mishra\***

*Department of Chemistry, Indian Institute of Technology-Madras, Chennai-36, India.*

*Fax: (+91) 44-22574202; Tel: (+91) 44-22574207, E-mail: [mishra@iitm.ac.in](mailto:mishra@iitm.ac.in)*

**Electronic Supplementary Information**

- 1. <sup>1</sup>H NMR of DMAPEPy**
- 2. <sup>13</sup>C NMR of DMAPEPy**
- 3. High Resolution Mass Spectrum of DMAPEPy**
- 4. FTIR Spectrum of DMAPEPy**
- 5. Effect of Temperature on the Emission Spectrum of DMAPEPy in Ethylene Glycol**
- 6. Experiment Showing Photostability of DMAPEPy**
- 7. Dependence of  $k_f$  on Solvent Polarity**

1. <sup>1</sup>H NMR Spectrum of DMAPEPy (CDCl<sub>3</sub>, 400 MHz)

δ = 8.67 (d, J = 8.8 Hz, 1H); 8.17-7.99 (m, 8H); 7.58 (d, J = 8.8 Hz, 2H); 6.73 (d, J = 8.8 Hz, 2H); 2.99 (s, 6H) ppm.

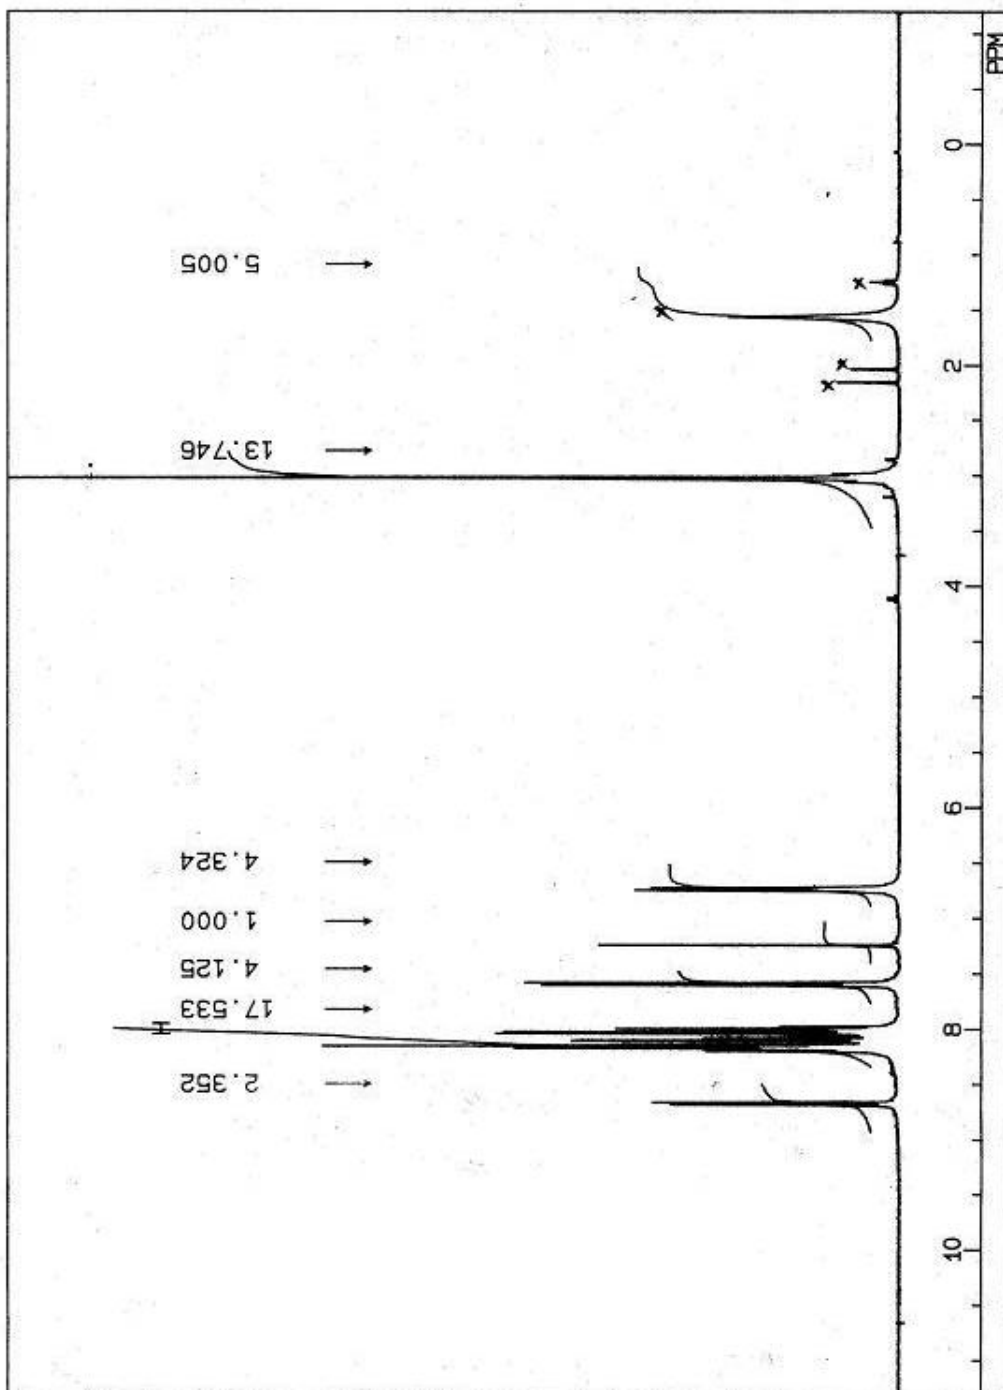

## 2. $^{13}\text{C}$ NMR Spectrum of DMAPEPy ( $\text{CDCl}_3$ , 100 MHz)

$\delta = 150.2, 132.8, 131.5, 131.4, 131.2, 130.6, 129.2, 128.0, 127.6, 127.3, 126.1, 125.8, 125.3, 124.5, 124.4, 118.9, 111.9, 110.3, 96.6, 86.7, 40.2$  ppm

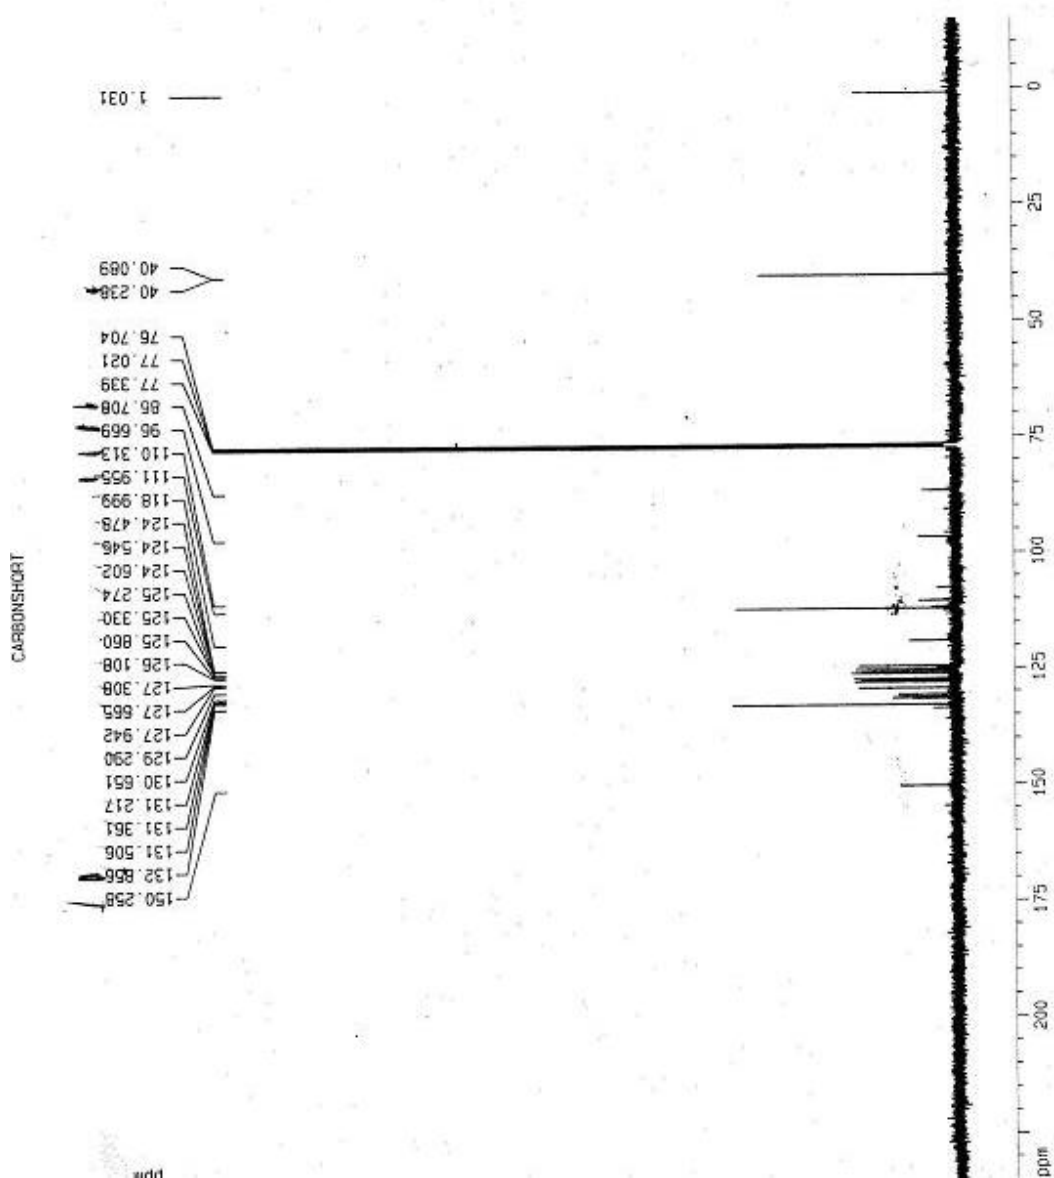

### 3. High Resolution Mass Spectrum of DMAPEPy

Calculated = 346.12, Obtained = 346.17

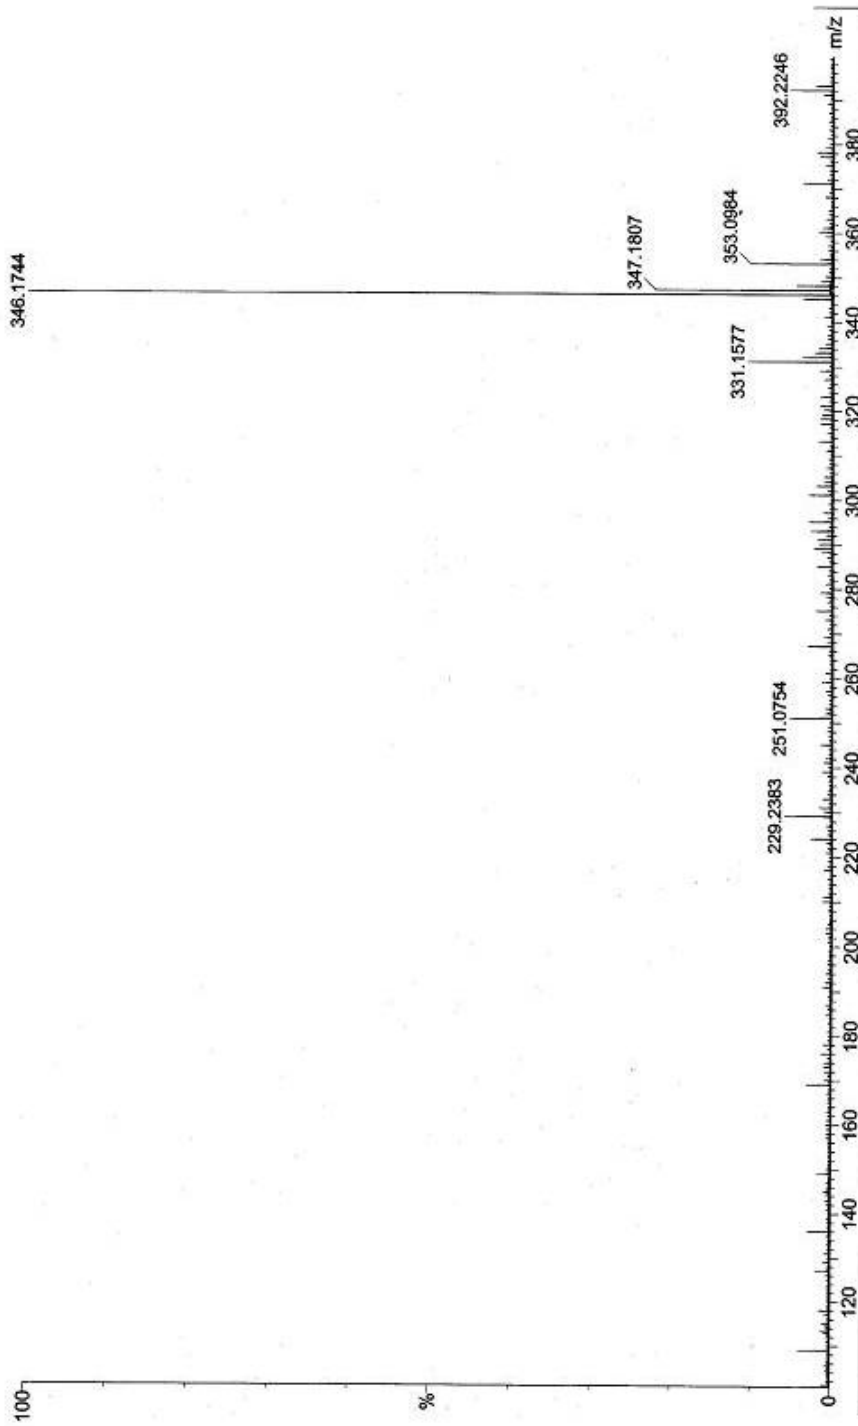

#### 4. FTIR Spectrum of DMAPEPy (KBr pellet)

2182  $\text{cm}^{-1}$  ( $\text{C} \equiv \text{C}$ )

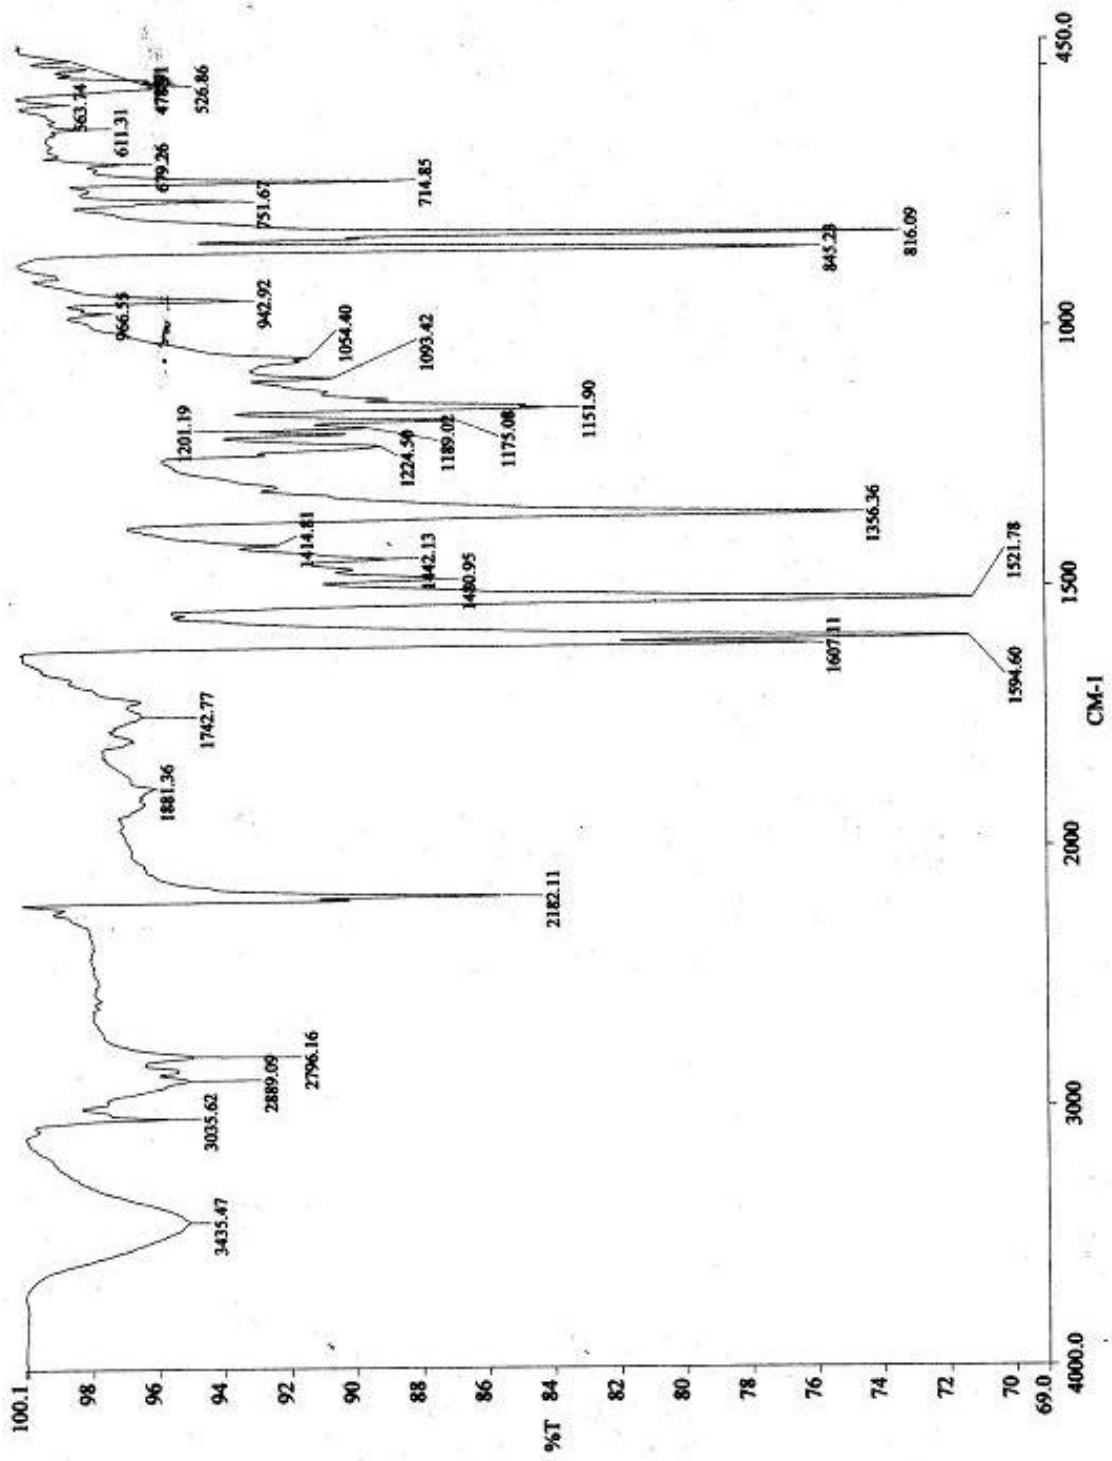

## 5. Effect of Temperature on the Emission Spectrum of DMAPEPy in Ethylene Glycol

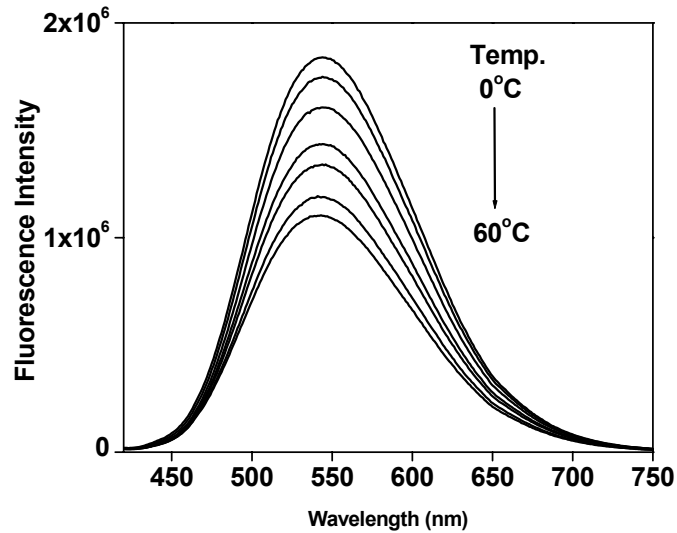

Emission Spectra of DMAPEPy in ethylene glycol as a function of temperature.  
( $\lambda_{\text{ex}} = 400 \text{ nm}$ ,  $\lambda_{\text{em}} = 547 \text{ nm}$ )

## 6. Experiment Showing Photostability of DMAPEPy

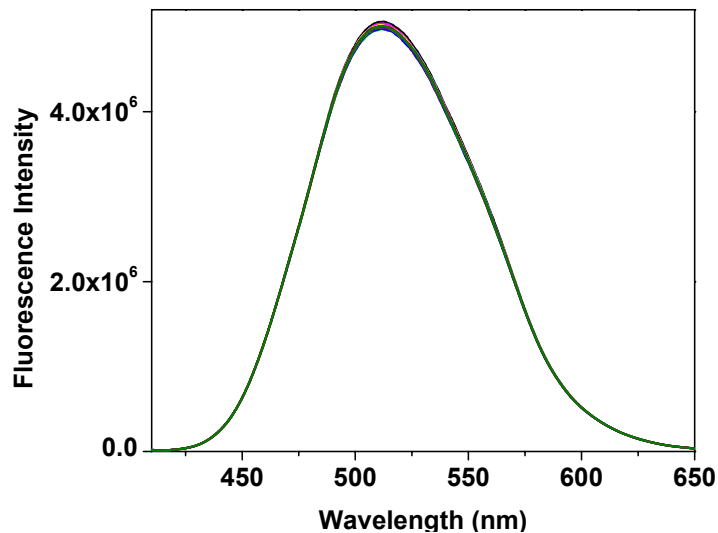

Emission spectra of DMAPEPy in ethanol as a function of time under continuous illumination at  $\lambda_{\text{ex}} = 400 \text{ nm}$  for 1 hour. Excitation slit = 10 nm, Emission slit = 2 nm.

## 7. Dependence of $k_f$ on Solvent Polarity

The solvent dependence of radiative decay rate constant for molecules showing intermolecular or intramolecular charge transfer can be explained by a three state model as suggested by Verhoeven and co-workers<sup>1,2</sup>. According to this model the radiative rate constant is given as

$$\frac{k_f}{n^3 \cdot \nu} = 3.1 \cdot 10^{-7} \cdot \left\{ (V \cdot \Delta\mu)^2 + 2 \cdot V \cdot V^* \cdot [\Delta\mu \cdot \mu^* \cdot \cos(\alpha)] \cdot \nu / (\Delta E_1 - \nu) + (V^* \cdot \mu^*)^2 \cdot \nu^2 / (\Delta E_1 - \nu)^2 \right\}$$

where,  $n$  = refractive index of the solvent

$\Delta\mu$  = change in the dipole moment (in Debye) accompanying charge transfer

$\mu^*$  = transition dipole moment of the unperturbed local  $DA \rightarrow (DA)^*$  transition

$\alpha$  = angle between  $\mu^*$  and  $\Delta\mu$

$\Delta E_1$  = energy gap between the  $(DA)^*$  and  $DA$  states

$\nu$  = mean energy of CT fluorescence (in  $\text{cm}^{-1}$ )

The above equation suggests a parabolic dependence of  $k_f / (n^3 \cdot \nu)$  on  $\nu / (\Delta E_1 - \nu)$ . In case of DMAPEPy the plot of  $k_f / (n^3 \cdot \nu)$  versus  $\nu / (\Delta E_1 - \nu)$  fits well into a second order polynomial equation when the data for dioxane and benzene are not included in the fit.

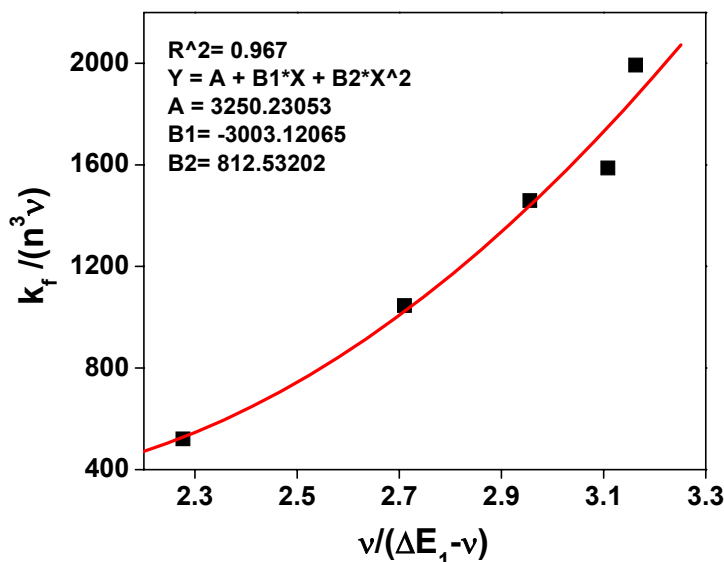

Second order polynomial fit for the  $k_f / (n^3 \cdot \nu)$  versus  $\nu / (\Delta E_1 - \nu)$  plot for DMAPEPy in various solvents. The absorption maximum of DMAPEPy in n-hexane was chosen as  $\Delta E_1$ .

1. M. Bixon, J. Jortner and J. W. Verhoeven, *J. Am. Chem. Soc.*, 1994, 116, 7349-7355.

2. J. W. Verhoeven, T. Scherer, B. wegwijs, R. M. Hermant, J. Jortner, M. Bixon, S. Depaemelaere and F. C. De Schryver, *Recl. Trav. Chim. Pays-Bas*, 1995, 114, 443-448.
